# Supplementary material
Source: PubMed Central journal article supplement (PMC2775939)
Supplement: me.2009-0025_1.pdf [file me.2009-0025_1.pdf]

FilteredRawArrayData

Affymetrix GeneChip Human Gene 1.0 ST Array

Microarray intensity values from each individual microarray are presented for genes found in the respective tables in the manuscript.

Genes in Table 1.

| Symbol   | Probe ID    | TRa1 1 -T3  | TRa1 2 -T3  | TRa1 3 -T3  | TRa1 1 +T3  | TRa1 2 +T3  | TRa1 3 +T3  | NR 1 -T3 | NR 1 +T3 | NR 2 +T3 | NR 3 +T3 | NR 1 -T3 | NR 1 +T3 | NR 2 +T3 | NR 3 +T3 |
|----------|-------------|-------------|-------------|-------------|-------------|-------------|-------------|----------|----------|----------|----------|----------|----------|----------|----------|
| ANGPTL2  | 8164200     | 70.40911551 | 71.80157149 | 67.06491707 | 117.1938388 | 123.0905712 | 90.77343655 |          |          |          |          |          |          |          |          |
|          | 70.49751809 | 63.62695027 | 67.18148632 | 98.67482031 | 109.2328145 | 78.53216207 | 59.78833302 |          |          |          |          |          |          |          |          |
|          | 53.00511426 | 66.73182457 | 69.74034445 | 61.57899341 | 64.45695307 |             |             |          |          |          |          |          |          |          |          |
| CLMN     | 7981142     | 80.2576134  | 76.87673581 | 80.23254976 | 129.2831535 | 126.6309916 | 142.5188449 |          |          |          |          |          |          |          |          |
|          | 55.82513045 | 57.56849501 | 55.23115612 | 80.35117356 | 68.54860227 | 80.72129388 | 62.64286898 |          |          |          |          |          |          |          |          |
|          | 46.92678854 | 56.85365434 | 60.25027623 | 65.34026513 | 68.57880811 |             |             |          |          |          |          |          |          |          |          |
| FLJ21963 | 7957386     | 640.9622849 | 680.6536621 | 629.8506537 | 817.1790084 | 922.7094979 |             |          |          |          |          |          |          |          |          |
|          | 896.9584503 | 575.3693258 | 631.2548872 | 595.7546677 | 754.9407151 | 823.3595748 | 771.020348  |          |          |          |          |          |          |          |          |
|          | 579.7555638 | 674.0412284 | 524.5698308 | 787.1454748 | 883.7948301 | 824.0348957 |             |          |          |          |          |          |          |          |          |
| GBE1     | 8088958     | 291.0320956 | 377.8327929 | 244.4950226 | 721.8412406 | 1053.411645 | 557.4435872 |          |          |          |          |          |          |          |          |
|          | 243.6328083 | 410.367591  | 225.658991  | 544.995165  | 757.6113662 | 453.8315228 | 266.4365429 |          |          |          |          |          |          |          |          |
|          | 355.7690887 | 291.314985  | 331.9380884 | 430.9196005 | 384.457219  |             |             |          |          |          |          |          |          |          |          |
| GRHPR    | 8155250     | 200.487256  | 151.4403133 | 189.9224468 | 312.196843  | 228.1160368 | 270.5357673 |          |          |          |          |          |          |          |          |
|          | 221.0404637 | 182.4254716 | 192.6815585 | 261.5228086 | 220.8211578 | 235.03097   | 230.3618374 |          |          |          |          |          |          |          |          |
|          | 213.8394184 | 214.0625383 | 241.9330586 | 236.5882036 | 228.5438    |             |             |          |          |          |          |          |          |          |          |
| HERPUD1  | 7995895     | 647.4430609 | 696.7236535 | 674.7261995 | 863.5675721 | 892.521928  | 969.0462156 |          |          |          |          |          |          |          |          |
|          | 695.5006416 | 706.6869233 | 724.2260759 | 897.0791749 | 895.9090597 | 980.214013  | 748.4532517 |          |          |          |          |          |          |          |          |
|          | 862.0116491 | 830.8773071 | 987.8466997 | 983.2671317 | 981.9680733 |             |             |          |          |          |          |          |          |          |          |
| IRF1     | 8114010     | 48.30435787 | 61.24149565 | 48.6357221  | 109.3076417 | 144.1804904 | 87.505861   |          |          |          |          |          |          |          |          |
|          | 58.71425857 | 57.46036131 | 51.15150608 | 82.64882421 | 91.85968194 | 63.42532463 | 62.00365092 |          |          |          |          |          |          |          |          |
|          | 50.9168215  | 50.50870912 | 69.98126003 | 72.51714937 | 70.41592988 |             |             |          |          |          |          |          |          |          |          |
| KCNJ10   | 7921533     | 21.85187865 | 25.25360759 | 27.63501294 | 65.23810312 | 76.26213762 | 63.10183994 |          |          |          |          |          |          |          |          |
|          | 27.10390202 | 31.51579864 | 31.47455847 | 50.0478928  | 44.17876743 | 44.26531103 | 20.65268054 |          |          |          |          |          |          |          |          |
|          | 27.4152395  | 30.42402825 | 25.04237788 | 30.80486803 | 25.95690535 |             |             |          |          |          |          |          |          |          |          |
| MMP11    | 8071758     | 53.52348508 | 70.57060175 | 72.09622287 | 86.0043924  | 125.8711295 | 118.8513546 |          |          |          |          |          |          |          |          |
|          | 56.82677248 | 64.46528016 | 66.33977855 | 80.1137414  | 103.2190753 | 96.1265774  | 58.90834828 |          |          |          |          |          |          |          |          |
|          | 74.21327249 | 65.35823368 | 74.9790877  | 104.40938   | 75.3739492  |             |             |          |          |          |          |          |          |          |          |
| MPV17L   | 7993453     | 151.7753087 | 131.4950652 | 170.3988883 | 267.5159471 | 348.9196533 | 362.0319103 |          |          |          |          |          |          |          |          |
|          | 159.3351216 | 159.7788081 | 187.7165531 | 264.4701986 | 300.3924476 | 326.0085265 | 140.5264396 |          |          |          |          |          |          |          |          |
|          | 185.5211898 | 186.9360378 | 214.1333298 | 246.0180663 | 284.3979749 |             |             |          |          |          |          |          |          |          |          |
| RHPN2    | 8035980     | 222.2743067 | 277.3192064 | 264.0155599 | 372.4851169 | 436.1831616 | 401.4604092 |          |          |          |          |          |          |          |          |
|          | 269.4846213 | 304.3268528 | 303.356357  | 423.4922228 | 417.7858557 | 468.1561444 | 238.670867  |          |          |          |          |          |          |          |          |
|          | 346.4824165 | 295.6914203 | 307.076668  | 394.1741477 | 446.4048537 |             |             |          |          |          |          |          |          |          |          |

FilteredRawArrayData

|                 |              |              |              |              |              |              |
|-----------------|--------------|--------------|--------------|--------------|--------------|--------------|
| SALL2 7977761   | 77. 23874992 | 76. 76058005 | 75. 93984001 | 111. 3478736 | 149. 1728945 | 141. 874622  |
| 65. 16660121    | 71. 85062841 | 74. 41192144 | 80. 05943661 | 113. 8504203 | 112. 6475729 | 61. 7597725  |
| 64. 91660151    | 69. 8410566  | 63. 90160413 | 52. 91214146 | 83. 18728204 |              |              |
| SLC38A3 8079931 | 449. 7503386 | 562. 2815655 | 546. 0631803 | 670. 1705929 | 832. 1717982 | 784. 8034077 |
| 497. 6607465    | 572. 0543319 | 516. 3467031 | 720. 1162628 | 799. 0263305 | 678. 8383091 | 485. 0165616 |
| 467. 830051     | 510. 8783667 | 607. 6701631 | 631. 2367571 | 620. 9789198 |              |              |
| TMEFF1 8156905  | 240. 304825  | 193. 0515165 | 192. 3266249 | 291. 898837  | 306. 6792205 | 329. 4292713 |
| 122. 0968143    | 140. 4710295 | 136. 1306706 | 174. 9550801 | 133. 8995752 | 181. 7182644 | 103. 1156283 |
| 120. 4950462    | 108. 2482029 | 160. 4645388 | 143. 2180185 | 136. 6581234 |              |              |
| ZNF165 8117630  | 78. 3378251  | 63. 90939639 | 81. 99418251 | 119. 5753051 | 141. 7848078 | 148. 7419837 |
| 63. 02920453    | 72. 51170533 | 93. 9999648  | 124. 7373447 | 129. 0224726 | 137. 6973303 | 76. 02415536 |
| 66. 62601628    | 80. 5404365  | 69. 66714734 | 89. 55064165 | 118. 7516403 |              |              |
| ACSM2B 7999965  | 209. 9470879 | 123. 7972854 | 174. 0970035 | 362. 1633706 | 310. 2086129 | 367. 7875335 |
| 175. 8305273    | 77. 15875416 | 150. 4488689 | 327. 035481  | 263. 8988104 | 260. 5388582 | 141. 9139334 |
| 90. 78614286    | 97. 88818264 | 254. 7379263 | 192. 6527261 | 183. 5860914 |              |              |
| HIF1A 7974851   | 766. 6535595 | 910. 6217698 | 737. 3419225 | 1050. 462209 | 1477. 000392 | 1106. 192429 |
| 672. 6896902    | 793. 7930387 | 772. 957319  | 1025. 557959 | 1226. 932301 | 1172. 021149 | 640. 1635015 |
| 714. 4430932    | 646. 8158332 | 840. 6697241 | 988. 377567  | 1028. 86109  |              |              |
| MASP1 8092661   | 45. 60181166 | 47. 50404446 | 44. 36346759 | 82. 82370169 | 73. 777906   | 57. 65559585 |
| 35. 19487782    | 45. 24326742 | 32. 88802961 | 68. 54549391 | 63. 09921567 | 58. 25601494 | 42. 54315888 |
| 44. 03953392    | 44. 15871035 | 43. 68663407 | 48. 93323978 | 44. 91358139 |              |              |
| PCK1 8063590    | 40. 1300469  | 43. 66351216 | 38. 48092772 | 79. 48606775 | 104. 7958744 | 67. 76656444 |
| 39. 01692331    | 50. 18913756 | 38. 29208913 | 165. 6306872 | 177. 2609466 | 75. 17879578 | 32. 56631271 |
| 52. 67774242    | 40. 1103903  | 42. 54290165 | 55. 00457202 | 34. 79495144 |              |              |
| ZMI Z1 7928558  | 119. 1718572 | 141. 4256237 | 132. 2909539 | 176. 6550637 | 204. 9605244 | 182. 5518916 |
| 113. 5254617    | 129. 0232902 | 116. 2599095 | 163. 754149  | 191. 226758  | 179. 9166543 | 123. 6440188 |
| 128. 1699269    | 145. 8695552 | 146. 4123574 | 157. 6951334 | 173. 7415418 |              |              |
| ARSB 8112807    | 420. 9787808 | 513. 8154881 | 467. 124258  | 658. 7331425 | 859. 00843   | 882. 54566   |
| 379. 6900705    | 437. 5757303 | 456. 8609774 | 632. 7406386 | 759. 8715121 | 834. 8485475 | 375. 2847812 |
| 512. 724475     | 501. 7718823 | 534. 3599435 | 761. 3601847 | 798. 9089369 |              |              |
| C18orf17        | 8020630      | 176. 4082306 | 139. 4526506 | 176. 670309  | 338. 036886  | 310. 7013247 |
| 352. 1047603    | 138. 5788081 | 141. 2414402 | 159. 4671009 | 308. 1652889 | 275. 3785001 | 259. 1613901 |
| 180. 0622556    | 181. 9763054 | 182. 1052274 | 224. 4701193 | 259. 906695  | 251. 4456289 |              |
| C1orf115        | 7909862      | 360. 2781089 | 361. 1504673 | 465. 9581291 | 522. 6017035 | 527. 4763336 |
| 701. 9450185    | 315. 8392383 | 314. 1625937 | 384. 114837  | 494. 4634693 | 491. 8052629 | 527. 9688311 |
| 335. 6266663    | 343. 4472264 | 325. 1659304 | 382. 1189359 | 400. 5944849 | 397. 8959661 |              |
| CABLES2 8067495 | 119. 1827864 | 178. 8942186 | 166. 9135233 | 254. 2895816 | 381. 2014072 | 312. 3736904 |
| 121. 5648469    | 172. 3042205 | 157. 2348026 | 230. 2508927 | 295. 8857377 | 279. 0101172 | 131. 7532163 |
| 160. 0834748    | 171. 5121414 | 198. 6465391 | 186. 2822039 | 197. 0121414 |              |              |
| CD14 8114612    | 39. 00870893 | 42. 76511833 | 36. 27923565 | 91. 37807468 | 67. 32363106 | 64. 2432992  |
| 31. 14549127    | 37. 98051472 | 33. 15062633 | 63. 89056971 | 57. 29317064 | 50. 74460701 | 33. 99008056 |
| 39. 8049413     | 33. 99872633 | 56. 89884127 | 43. 62059027 | 46. 16165437 |              |              |
| CPT1A 7949971   | 95. 51685537 | 126. 3989168 | 94. 56951994 | 188. 4662997 | 283. 6787074 | 205. 2463929 |
| 98. 6417783     | 110. 6796728 | 96. 36449684 | 186. 106993  | 258. 0357888 | 168. 816513  | 83. 95718453 |

FilteredRawArrayData

|                 |              |              |              |              |              |              |
|-----------------|--------------|--------------|--------------|--------------|--------------|--------------|
| 97. 34120398    | 87. 67909329 | 108. 4571954 | 154. 9228075 | 136. 6168946 |              |              |
| CYP24A1 8067140 | 67. 72846179 | 47. 20606967 | 38. 7277655  | 240. 879701  | 182. 656206  | 133. 8362637 |
| 34. 73115049    | 40. 62745901 | 23. 25965499 | 149. 3833285 | 131. 996117  | 75. 10449252 | 132. 6671841 |
| 91. 94424568    | 87. 94059143 | 170. 7881358 | 121. 3930881 | 119. 3157759 |              |              |
| ENG 8164269     | 77. 07437361 | 103. 1607303 | 82. 0209863  | 256. 9899179 | 255. 7108533 | 165. 434238  |
| 64. 61917003    | 86. 75551931 | 66. 98596293 | 114. 5860646 | 138. 8113343 | 123. 0320877 | 64. 88980649 |
| 73. 03088003    | 72. 15925022 | 63. 89592203 | 67. 54418827 | 69. 80681404 |              |              |
| FYN 8128956     | 184. 5454748 | 225. 7746585 | 196. 6886487 | 699. 6957059 | 783. 1321269 | 614. 4561113 |
| 105. 9807651    | 129. 6381306 | 108. 9001409 | 320. 6347615 | 348. 2715049 | 248. 0531047 | 111. 0344928 |
| 109. 4378439    | 113. 2794339 | 175. 1784636 | 169. 3859642 | 173. 9097609 |              |              |
| HIVEP2 8129953  | 48. 90244595 | 50. 65303946 | 42. 38552247 | 111. 2129098 | 103. 1758866 | 115. 1318412 |
| 38. 71380704    | 37. 29082829 | 38. 71076405 | 83. 35223694 | 101. 8069203 | 89. 57528732 | 43. 38589195 |
| 43. 54649486    | 46. 86386873 | 63. 46430023 | 86. 55985858 | 72. 63962725 |              |              |
| LDLRAD1 7916364 | 41. 71178433 | 56. 61246805 | 42. 00268178 | 84. 75095972 | 86. 86777181 | 72. 08372478 |
| 43. 40278616    | 34. 95344278 | 46. 13965369 | 92. 87721007 | 70. 08188688 | 65. 58979163 | 45. 61177012 |
| 41. 32775592    | 36. 37867742 | 64. 99030439 | 60. 3550697  | 61. 00980649 |              |              |
| PPL 7999253     | 59. 81344675 | 69. 19006085 | 47. 52094579 | 94. 65577615 | 150. 329554  | 91. 03181241 |
| 41. 55256336    | 55. 02138069 | 51. 65371028 | 95. 94630856 | 111. 0746797 | 84. 18227781 | 42. 56415651 |
| 57. 54703591    | 62. 53816825 | 58. 73974967 | 66. 94410413 | 59. 27499213 |              |              |
| PTAFR 7914184   | 38. 30479369 | 55. 0163618  | 54. 37083133 | 119. 5385155 | 135. 4062101 | 117. 9517452 |
| 34. 16055274    | 49. 59631265 | 42. 03020294 | 70. 3156608  | 91. 97353293 | 86. 0146467  | 44. 6907781  |
| 42. 42608909    | 53. 22267907 | 42. 07847617 | 49. 18048507 | 47. 31236156 |              |              |
| RAB11FIP4       | 8006298      | 165. 7533668 | 203. 8985201 | 205. 8301519 | 318. 8772362 | 344. 4950473 |
| 342. 1288078    | 179. 2161114 | 201. 7549601 | 203. 5622397 | 265. 1382291 | 357. 9650914 | 304. 8352566 |
| 181. 7977708    | 185. 6278562 | 166. 3218435 | 262. 0421882 | 240. 4681378 | 245. 9729274 |              |
| RASSF4 7927186  | 159. 3677585 | 191. 6769492 | 191. 712608  | 252. 8103843 | 304. 2939147 | 343. 1042433 |
| 135. 9864161    | 177. 3794534 | 160. 6718447 | 254. 9122429 | 283. 9498757 | 276. 1596649 | 181. 2638453 |
| 192. 8438686    | 173. 6656836 | 227. 1503367 | 248. 2903662 | 268. 5473066 |              |              |
| SCNN1A 7960529  | 46. 87612478 | 48. 0587246  | 32. 75076382 | 168. 2291905 | 172. 7940864 | 100. 8848692 |
| 45. 77104013    | 45. 14109521 | 38. 38321004 | 118. 2449942 | 139. 1355789 | 71. 38979766 | 62. 48107815 |
| 61. 88055598    | 56. 66848888 | 123. 3701776 | 111. 9712051 | 91. 26028705 |              |              |
| SERPINB9        | 8123609      | 107. 5807949 | 147. 1679511 | 136. 8784025 | 208. 8818619 | 321. 9593481 |
| 95. 57172155    | 111. 6269059 | 93. 76360657 | 202. 6880937 | 244. 193416  | 183. 7404125 | 289. 61929   |
| 92. 58343733    | 75. 26969667 | 93. 61426586 | 110. 9283041 | 116. 9480465 |              | 75. 36838145 |
| SGK 8129677     | 62. 38712977 | 45. 12459067 | 37. 81014713 | 101. 0581891 | 84. 0255408  | 72. 88239807 |
| 103. 4900339    | 77. 71654215 | 83. 33052952 | 200. 3836143 | 160. 2051455 | 170. 595852  | 65. 66897795 |
| 48. 49034718    | 61. 14374823 | 92. 25446337 | 77. 93063295 | 88. 94665339 |              |              |
| SLC16A6 8017843 | 125. 0102467 | 69. 77898249 | 68. 42989322 | 250. 9678563 | 233. 0917132 | 165. 4478032 |
| 68. 310512      | 70. 21071515 | 56. 21317066 | 167. 9733502 | 179. 2610107 | 125. 7153466 | 107. 2452106 |
| 106. 7554333    | 99. 91955202 | 219. 7101943 | 188. 9928142 | 187. 9225249 |              |              |
| TNS4 8015016    | 51. 79073628 | 67. 42127685 | 60. 15394341 | 160. 4547888 | 170. 3096303 | 166. 9922149 |
| 63. 12959389    | 82. 18533475 | 68. 04839067 | 112. 9292349 | 172. 1573126 | 139. 1538312 | 58. 42254831 |
| 85. 87953675    | 78. 16971782 | 89. 69235278 | 126. 5556433 | 157. 8480947 |              |              |
| TP53INP2        | 8062034      | 159. 5554819 | 250. 6939492 | 168. 7923559 | 449. 0725533 | 779. 0834931 |

FilteredRawArrayData

|                |              |              |              |              |              |              |
|----------------|--------------|--------------|--------------|--------------|--------------|--------------|
| 554. 9997938   | 162. 9776974 | 240. 610721  | 132. 7041111 | 402. 1028712 | 667. 7032003 | 484. 9856238 |
| 147. 2938237   | 182. 2012495 | 163. 4269859 | 327. 6111392 | 436. 7024681 | 357. 6347678 |              |
| USP30 7958439  | 103. 6385068 | 114. 2696358 | 121. 1691418 | 141. 3207135 | 165. 6953026 | 184. 6733257 |
| 109. 8499399   | 114. 0509647 | 109. 8576522 | 144. 6594066 | 159. 1373419 | 165. 7435029 | 92. 33502719 |
| 97. 01819009   | 110. 0246768 | 125. 8239009 | 128. 236316  | 132. 2909722 |              |              |
| SLC2A1 7915472 | 1799. 58779  | 1904. 573665 | 2068. 974535 | 1392. 393366 | 1231. 031178 | 1259. 354559 |
| 2585. 764602   | 2664. 910294 | 2491. 462138 | 1647. 39517  | 1719. 315681 | 1564. 890468 | 2309. 609904 |
| 2341. 646543   | 2657. 117673 | 1860. 68988  | 1851. 037374 | 2022. 088169 |              |              |
| COQ10A 7956242 | 66. 23161123 | 86. 60059706 | 71. 42108637 | 263. 7871387 | 271. 0684125 | 268. 2897034 |
| 78. 69785469   | 84. 49799853 | 63. 24935258 | 249. 636546  | 250. 8457309 | 217. 4314334 | 87. 69318032 |
| 73. 30367264   | 66. 99667227 | 230. 0840699 | 167. 1792054 | 203. 3797492 |              |              |

Genes in Table 2.

|                |                      |              |              |              |              |              |
|----------------|----------------------|--------------|--------------|--------------|--------------|--------------|
| AFP 8095646    | 5503. 68744          | 5102. 267301 | 4871. 696154 | 5031. 951187 | 4931. 348228 | 4993. 421526 |
| 6267. 637213   | 6138. 69795          | 6572. 780751 | 6181. 830368 | 5905. 691054 | 6630. 482436 | 6156. 129733 |
| 6337. 422224   | 5924. 856505         | 6160. 553324 | 6492. 33747  | 6650. 650421 |              |              |
| ATP10A 7986789 | 27. 22637722         | 31. 71050426 | 41. 87413079 | 27. 5380526  | 24. 40255374 | 25. 42382063 |
| 50. 85981023   | 61. 06809073         | 62. 89187164 | 54. 26717356 | 55. 00872514 | 54. 78135825 | 39. 63266537 |
| 45. 20785551   | 49. 650573           | 44. 3074777  | 41. 76481353 | 46. 07114523 |              |              |
| C14orf126      | 7978527 237. 2333092 | 234. 440028  | 216. 4977838 | 227. 6732923 | 230. 7903195 |              |
| 210. 0476478   | 309. 7700608         | 284. 6163438 | 307. 2662955 | 306. 8401791 | 304. 1557365 | 331. 1089259 |
| 283. 1186219   | 305. 760162          | 271. 0100721 | 289. 527427  | 297. 1813291 | 320. 7455116 |              |
| CAP2 8117054   | 98. 01337482         | 113. 7445956 | 74. 41289939 | 77. 13975568 | 111. 0664597 | 75. 85804839 |
| 159. 1506027   | 195. 0388409         | 139. 603233  | 128. 1945812 | 155. 2977589 | 131. 4012546 | 157. 0893371 |
| 175. 1858962   | 188. 9950814         | 132. 8379609 | 188. 7135943 | 205. 317494  |              |              |
| CYP7A1 8150920 | 17. 67913953         | 14. 27321783 | 15. 90804416 | 11. 33692396 | 14. 03743683 | 15. 91270895 |
| 19. 90027374   | 11. 61622877         | 17. 33177572 | 25. 94793206 | 13. 83597708 | 10. 79631529 | 29. 69836396 |
| 27. 32290695   | 24. 57165532         | 33. 02846139 | 31. 10346309 | 24. 124527   |              |              |
| DOCK9 7972487  | 23. 53483599         | 24. 52922109 | 29. 44582848 | 30. 42123278 | 31. 87189563 | 27. 39584056 |
| 50. 4812515    | 54. 2652455          | 69. 57300181 | 40. 76209067 | 50. 94602683 | 69. 57215118 | 56. 36628175 |
| 68. 73667116   | 89. 03358392         | 43. 53746821 | 79. 18984892 | 93. 07608192 |              |              |
| F13B 7923073   | 9. 908478026         | 9. 726776729 | 9. 496096493 | 12. 23033111 | 12. 00452577 | 11. 64716785 |
| 12. 75421107   | 9. 200959699         | 9. 690019586 | 33. 63327733 | 13. 6955104  | 14. 12663226 | 15. 84927893 |
| 13. 24370093   | 11. 44152415         | 32. 41120446 | 26. 18006144 | 27. 64327847 |              |              |
| FKBP14 8138834 | 186. 620111          | 159. 9092154 | 153. 9452889 | 156. 3964168 | 172. 6615329 | 168. 0086641 |
| 194. 4622513   | 204. 3097375         | 197. 3123301 | 183. 288849  | 193. 3943536 | 186. 9953509 | 191. 0204724 |
| 187. 3235967   | 215. 633439          | 208. 750659  | 222. 1793749 | 243. 8317515 |              |              |
| FRMD3 8161964  | 47. 51069571         | 57. 43612236 | 54. 11214145 | 32. 90748232 | 53. 28653673 | 47. 51736686 |
| 56. 14547478   | 71. 30250625         | 69. 46518008 | 53. 15967634 | 58. 38147988 | 58. 14710923 | 67. 84839122 |
| 69. 07346961   | 74. 87051284         | 65. 49975887 | 77. 27081507 | 62. 16732576 |              |              |
| GDA 8155802    | 21. 52883409         | 19. 36247104 | 16. 23341688 | 17. 42802882 | 21. 9969926  | 17. 85100326 |
| 19. 60462986   | 26. 12630288         | 25. 45420177 | 19. 23820445 | 23. 69451442 | 22. 76831241 | 29. 28244656 |
| 44. 88674147   | 38. 64555774         | 28. 81555317 | 42. 27003678 | 41. 51118068 |              |              |
| LYZ 7957023    | 3405. 428861         | 3089. 960265 | 2664. 317116 | 3181. 860577 | 3111. 158484 | 2697. 304374 |

|                |              |              |              |              |              |              |
|----------------|--------------|--------------|--------------|--------------|--------------|--------------|
| 3977. 93711    | 3820. 724921 | 3776. 949356 | 3898. 735085 | 3758. 406531 | 3829. 015055 | 3990. 060767 |
| 4234. 476716   | 3602. 699226 | 3897. 185168 | 4452. 842342 | 4129. 591045 |              |              |
| NROB2 7914000  | 239. 7580056 | 200. 5490375 | 231. 7120259 | 310. 145195  | 237. 6296099 | 251. 3791245 |
| 291. 9499907   | 303. 8755437 | 274. 1329406 | 309. 6599221 | 307. 0124716 | 302. 4830483 | 329. 0806014 |
| 355. 6583294   | 352. 4420921 | 325. 7452317 | 368. 2437961 | 356. 1185656 |              |              |
| NUBPL 7973826  | 191. 6472774 | 201. 9222776 | 209. 3407016 | 191. 2997885 | 185. 5872403 | 188. 939632  |
| 275. 8083433   | 259. 7363309 | 281. 7257604 | 262. 8588692 | 253. 1035367 | 254. 8248424 | 217. 2462701 |
| 238. 6333961   | 258. 7361609 | 224. 7025837 | 267. 0963105 | 256. 1398806 |              |              |
| OXA1L 7973314  | 942. 9546272 | 835. 7573975 | 926. 0572457 | 1081. 83609  | 977. 3428246 | 1005. 578145 |
| 1126. 082226   | 1169. 684523 | 1124. 000693 | 1171. 431646 | 1263. 832102 | 1242. 310956 | 1177. 292956 |
| 1110. 860394   | 1182. 220657 | 1165. 385125 | 1280. 670304 | 1314. 719757 |              |              |
| PAWR 7965112   | 176. 3369757 | 181. 9533097 | 154. 0660041 | 149. 1371744 | 173. 4046146 | 151. 645942  |
| 175. 7549791   | 199. 796608  | 176. 0556372 | 169. 9543387 | 177. 7714143 | 168. 8430026 | 196. 3144642 |
| 210. 4809548   | 171. 8852877 | 209. 1088134 | 221. 4997631 | 211. 2999737 |              |              |
| PCSK5 8155898  | 12. 22342376 | 13. 70636132 | 12. 56380031 | 15. 50828965 | 16. 20782626 | 12. 21504525 |
| 17. 35767085   | 16. 92367025 | 16. 83767075 | 16. 99965428 | 17. 49677881 | 16. 12044374 | 17. 52522316 |
| 20. 6629513    | 19. 19457275 | 16. 3991678  | 20. 58793555 | 15. 02220557 |              |              |
| PELI1 8052654  | 126. 2520066 | 124. 5997193 | 126. 8305766 | 116. 5070866 | 153. 2109938 | 137. 9171225 |
| 167. 0604065   | 183. 4746537 | 165. 9213657 | 150. 664817  | 158. 2890133 | 143. 6110166 | 166. 8845992 |
| 198. 1772109   | 176. 7816664 | 138. 865095  | 174. 9577309 | 194. 2781829 |              |              |
| SCN1A 8056457  | 18. 57427941 | 22. 59532313 | 29. 43557394 | 13. 79333535 | 13. 67827482 | 19. 08639788 |
| 34. 65814881   | 33. 74352388 | 49. 99570688 | 27. 97450553 | 25. 33796402 | 30. 95549097 | 25. 59164513 |
| 31. 28487042   | 26. 88074132 | 24. 84297371 | 30. 90257332 | 29. 83480659 |              |              |
| SGEF 8083471   | 25. 30154864 | 17. 28085567 | 20. 30965945 | 23. 47129454 | 18. 63116633 | 21. 70673026 |
| 29. 2191093    | 31. 89826692 | 35. 62750672 | 27. 18732997 | 29. 47501569 | 25. 79755084 | 30. 16622136 |
| 37. 80565812   | 42. 13512488 | 27. 97608377 | 42. 96674432 | 37. 52949371 |              |              |
| SLC2A1 7915472 | 1799. 58779  | 1904. 573665 | 2068. 974535 | 1392. 393366 | 1231. 031178 | 1259. 354559 |
| 2585. 764602   | 2664. 910294 | 2491. 462138 | 1647. 39517  | 1719. 315681 | 1564. 890468 | 2309. 609904 |
| 2341. 646543   | 2657. 117673 | 1860. 68988  | 1851. 037374 | 2022. 088169 |              |              |
| SNX6 7978570   | 638. 8287609 | 510. 3659323 | 533. 9965674 | 590. 7849872 | 560. 3421892 | 559. 4664592 |
| 729. 5114193   | 728. 7712135 | 779. 481927  | 766. 4913985 | 728. 8943422 | 740. 7491567 | 692. 4839742 |
| 760. 0374294   | 725. 3078204 | 760. 8570972 | 786. 536724  | 778. 8282816 |              |              |
| TFPI 8057599   | 404. 5973343 | 337. 9772223 | 310. 0912303 | 347. 353213  | 341. 7757396 | 303. 4615011 |
| 503. 1669198   | 424. 314581  | 414. 8922933 | 477. 9577388 | 379. 6792736 | 387. 8139331 | 491. 3444073 |
| 545. 0933754   | 443. 5554802 | 460. 8109093 | 599. 4469622 | 513. 112968  |              |              |
| TTR 8020795    | 1584. 985706 | 1251. 366219 | 1141. 545585 | 1334. 883712 | 1158. 02615  | 1033. 78535  |
| 2171. 573532   | 2110. 978814 | 1661. 442413 | 2069. 054267 | 1927. 924849 | 1651. 118176 | 2144. 352875 |
| 2042. 952478   | 1756. 42265  | 2154. 45754  | 2195. 143035 | 1830. 398416 |              |              |
| VPS54 8052626  | 190. 1386921 | 169. 9222306 | 162. 882044  | 165. 2317915 | 203. 6288839 | 168. 4057883 |
| 250. 1254878   | 227. 3250063 | 244. 2111393 | 224. 4730678 | 194. 9683138 | 210. 5298851 | 245. 6920555 |
| 263. 4451795   | 275. 4454748 | 230. 6257291 | 272. 9127269 | 274. 4794604 |              |              |
| ANKRD1 7934979 | 237. 8407469 | 225. 4748006 | 202. 0285194 | 164. 522609  | 142. 8193871 | 159. 6288286 |
| 299. 3181391   | 355. 7076985 | 284. 1412838 | 146. 3465489 | 219. 5070922 | 174. 0286132 | 389. 7522895 |
| 598. 6634908   | 421. 3621722 | 365. 8935837 | 472. 5590367 | 406. 2465519 |              |              |

|                 |              |              |              |              |              |              |
|-----------------|--------------|--------------|--------------|--------------|--------------|--------------|
| BI CC1 7927681  | 23. 28743325 | 19. 22086557 | 15. 572684   | 19. 95654366 | 20. 29364339 | 13. 49337069 |
| 19. 34654154    | 23. 82959747 | 20. 67151672 | 22. 83495664 | 23. 80465684 | 18. 89847261 | 48. 74894652 |
| 49. 10353635    | 63. 08848672 | 41. 48396898 | 79. 64746621 | 62. 76252889 |              |              |
| DPYD 7917912    | 62. 5687504  | 57. 97672843 | 62. 02699241 | 54. 22750386 | 71. 49730615 | 57. 22519849 |
| 69. 35312909    | 60. 2535348  | 65. 76593595 | 61. 60773557 | 55. 27905352 | 65. 33976496 | 91. 82954137 |
| 108. 0639192    | 108. 4599248 | 85. 81632255 | 111. 1844667 | 109. 6819252 |              |              |
| ERRFI1 7912157  | 729. 2568378 | 667. 9528837 | 671. 85283   | 818. 2510459 | 842. 9891545 | 814. 4446723 |
| 672. 0467862    | 690. 828509  | 718. 526894  | 857. 0177669 | 864. 8090454 | 866. 9125424 | 937. 7256899 |
| 910. 6285215    | 1083. 15499  | 1098. 536999 | 1016. 753283 | 1153. 088419 |              |              |
| GPC3 8175234    | 2324. 36968  | 2658. 612619 | 2169. 360499 | 2351. 166879 | 2840. 821065 | 2356. 635825 |
| 2624. 885723    | 2734. 351375 | 2263. 829707 | 2729. 402823 | 2534. 513267 | 2152. 240546 | 3599. 025205 |
| 3867. 861657    | 3616. 183815 | 3523. 531462 | 3945. 576212 | 3859. 078389 |              |              |
| HDAC1 7899774   | 987. 6229221 | 958. 8580588 | 971. 6209046 | 1037. 693965 | 1000. 133054 | 1061. 424664 |
| 1145. 067346    | 1039. 413363 | 1082. 571125 | 1123. 629055 | 934. 1805575 | 1038. 208346 | 1334. 712141 |
| 1377. 774726    | 1532. 026452 | 1350. 727022 | 1390. 740448 | 1520. 678561 |              |              |
| LTB4DH 8163328  | 116. 1251493 | 82. 08481253 | 95. 31868436 | 106. 0997087 | 106. 1664871 | 105. 3798351 |
| 93. 15510728    | 92. 14987923 | 73. 0309167  | 109. 4509633 | 102. 4486479 | 87. 97552411 | 186. 2658502 |
| 180. 6874752    | 174. 1949379 | 186. 3067483 | 198. 808555  | 197. 8012598 |              |              |
| PROM1 8099476   | 54. 02236456 | 49. 69296056 | 38. 04071787 | 37. 26299856 | 48. 27177214 | 32. 08337829 |
| 102. 1820374    | 74. 54436001 | 73. 74355467 | 66. 51341611 | 54. 97767293 | 63. 69459819 | 160. 1640952 |
| 181. 3335009    | 173. 200003  | 146. 7655261 | 170. 5121414 | 177. 0438328 |              |              |
| SCHI P1 8083677 | 31. 67590577 | 36. 35429348 | 35. 11122325 | 29. 1537443  | 34. 95450624 | 29. 68249389 |
| 24. 778375      | 36. 42493795 | 30. 11881301 | 23. 2436149  | 31. 87948517 | 27. 92749505 | 51. 21632926 |
| 43. 07692163    | 37. 86665543 | 46. 39457177 | 63. 09882429 | 44. 88718604 |              |              |
| BHMT2 8106494   | 185. 3929459 | 155. 4033116 | 132. 4674288 | 171. 5122488 | 141. 5006305 | 150. 5362267 |
| 96. 46419224    | 105. 4476356 | 96. 78768599 | 102. 8670863 | 100. 9593718 | 101. 4650299 | 156. 1448751 |
| 151. 9648795    | 156. 653942  | 167. 6627593 | 127. 6557446 | 149. 031479  |              |              |
| C3orf57 8091799 | 16. 24459148 | 20. 05933761 | 19. 01489162 | 16. 45281541 | 18. 24265685 | 18. 88413266 |
| 15. 51902407    | 19. 63982582 | 15. 25388969 | 16. 97153434 | 18. 45296773 | 14. 20708596 | 24. 32002231 |
| 31. 79837824    | 26. 79794816 | 21. 73282393 | 28. 00453984 | 28. 68388186 |              |              |
| CDCA7L 8138489  | 96. 3124652  | 75. 95129368 | 94. 62049368 | 126. 1100611 | 120. 3949043 | 132. 4381816 |
| 55. 71756951    | 42. 73270945 | 49. 81527346 | 58. 57053514 | 47. 44032872 | 47. 62078237 | 87. 78908667 |
| 80. 57709081    | 118. 3121414 | 95. 98549488 | 93. 37731328 | 127. 2309816 |              |              |

FilteredRawArrayData

|                 |              |              |              |              |              |              |
|-----------------|--------------|--------------|--------------|--------------|--------------|--------------|
| ALDH8A1 8129695 | 104. 3925202 | 69. 81112932 | 59. 73408453 | 73. 85707348 | 48. 72493145 | 70. 04075434 |
| 30. 26425924    | 31. 23447728 | 32. 81848972 | 30. 26043228 | 28. 40570129 | 34. 88043747 | 32. 68367969 |
| 33. 66951509    | 32. 77090516 | 43. 50217209 | 32. 93147482 | 30. 97327681 |              |              |
| ANGPTL2 8164200 | 70. 40911551 | 71. 80157149 | 67. 06491707 | 117. 1938388 | 123. 0905712 | 90. 77343655 |
| 70. 49751809    | 63. 62695027 | 67. 18148632 | 98. 67482031 | 109. 2328145 | 78. 53216207 | 59. 78833302 |
| 53. 00511426    | 66. 73182457 | 69. 74034445 | 61. 57899341 | 64. 45695307 |              |              |
| APCDD1 8020141  | 93. 5454633  | 111. 5621414 | 111. 1968471 | 80. 00032501 | 84. 47070316 | 74. 74663002 |
| 62. 24389331    | 77. 60807972 | 65. 47818087 | 53. 71873237 | 56. 77991668 | 58. 39165203 | 50. 5785695  |
| 59. 38427467    | 51. 12562907 | 51. 86382884 | 46. 52474618 | 39. 55383496 |              |              |

FilteredRawArrayData

|          |              |              |              |              |              |              |              |
|----------|--------------|--------------|--------------|--------------|--------------|--------------|--------------|
| ARSI     | 8115144      | 258. 7966022 | 376. 9889024 | 245. 3913891 | 251. 2143344 | 326. 4037169 | 174. 5078591 |
|          | 178. 1881051 | 185. 7903129 | 120. 5817933 | 168. 0629639 | 202. 8356723 | 107. 778144  | 126. 2379203 |
|          | 99. 78821478 | 94. 98704875 | 99. 00906743 | 111. 2136883 | 105. 6030772 |              |              |
| BHMT     | 8106504      | 105. 6540718 | 73. 19418145 | 102. 6571407 | 96. 34615201 | 67. 23564561 | 119. 076511  |
|          | 49. 1523809  | 47. 86210936 | 58. 71934415 | 66. 96882949 | 48. 69600228 | 54. 18992949 | 48. 92867624 |
|          | 43. 08943245 | 49. 43555046 | 60. 13446447 | 52. 29043932 | 46. 49196243 |              |              |
| C12orf40 |              | 7954794      | 17. 11749503 | 13. 55376378 | 7. 870719502 | 8. 176812846 | 12. 93745884 |
|          | 8. 615867396 | 6. 420655061 | 7. 715104388 | 6. 370307444 | 5. 759652673 | 7. 671899549 | 8. 051538951 |
|          | 5. 844724353 | 6. 658758603 | 4. 75394285  | 6. 254424996 | 7. 356622252 | 5. 029781434 |              |
| C1S      | 7953603      | 162. 7635707 | 99. 31758536 | 104. 7265856 | 182. 7197135 | 130. 2604347 | 138. 6094724 |
|          | 87. 9211555  | 68. 1990409  | 55. 98293967 | 99. 08875999 | 77. 66957755 | 63. 37530925 | 77. 70410428 |
|          | 59. 73533141 | 58. 11990763 | 78. 21412435 | 58. 92277408 | 62. 10536156 |              |              |
| C1orf115 |              | 7909862      | 360. 2781089 | 361. 1504673 | 465. 9581291 | 522. 6017035 | 527. 4763336 |
|          | 701. 9450185 | 315. 8392383 | 314. 1625937 | 384. 114837  | 494. 4634693 | 491. 8052629 | 527. 9688311 |
|          | 335. 6266663 | 343. 4472264 | 325. 1659304 | 382. 1189359 | 400. 5944849 | 397. 8959661 |              |
| C2orf54  | 8060187      | 56. 23264759 | 73. 74157713 | 68. 99786706 | 80. 96857861 | 83. 95217498 | 69. 74682042 |
|          | 62. 01278904 | 75. 33910871 | 62. 86985607 | 51. 64459691 | 59. 78342273 | 63. 9900913  | 64. 91134159 |
|          | 60. 28808138 | 59. 5832316  | 62. 2859644  | 48. 38327752 | 44. 9715846  |              |              |
| CCL16    | 8014342      | 89. 80050053 | 46. 57503022 | 58. 41770007 | 94. 5617097  | 69. 32706382 | 70. 14173442 |
|          | 60. 98883894 | 50. 23593945 | 47. 9026201  | 66. 95150694 | 51. 91571268 | 45. 00633259 | 35. 96029545 |
|          | 39. 65087396 | 29. 95866446 | 37. 81488876 | 32. 50374111 | 37. 47621348 |              |              |
| CD14     | 8114612      | 39. 00870893 | 42. 76511833 | 36. 27923565 | 91. 37807468 | 67. 32363106 | 64. 2432992  |
|          | 31. 14549127 | 37. 98051472 | 33. 15062633 | 63. 89056971 | 57. 29317064 | 50. 74460701 | 33. 99008056 |
|          | 39. 8049413  | 33. 99872633 | 56. 89884127 | 43. 62059027 | 46. 16165437 |              |              |
| CENTD1   | 8099760      | 19. 70604165 | 22. 13089147 | 24. 82998038 | 16. 77723102 | 17. 2600325  | 22. 76659326 |
|          | 12. 70052282 | 12. 06378537 | 12. 66434268 | 12. 79332221 | 13. 74652875 | 12. 9735014  | 11. 15257872 |
|          | 12. 35374387 | 12. 48910751 | 10. 76328027 | 13. 42776973 | 13. 041306   |              |              |
| CES4     | 7995729      | 100. 4174545 | 73. 70845843 | 82. 67319351 | 89. 61023621 | 87. 12758308 | 94. 53089271 |
|          | 72. 01736655 | 62. 57880811 | 70. 36931631 | 75. 21214144 | 62. 8794099  | 71. 14080834 | 52. 32480091 |
|          | 40. 70464498 | 43. 96990253 | 44. 34547776 | 39. 84256294 | 51. 40776547 |              |              |
| CLDN6    | 7998898      | 662. 9788081 | 895. 2285785 | 566. 5105345 | 690. 1788081 | 938. 3641924 | 684. 3422365 |
|          | 265. 0751107 | 415. 2280598 | 156. 4301127 | 223. 9360344 | 423. 4121414 | 194. 5985521 | 238. 800805  |
|          | 244. 5550456 | 207. 0131535 | 286. 3514293 | 243. 4027622 | 184. 7335805 |              |              |
| CLMN     | 7981142      | 80. 2576134  | 76. 87673581 | 80. 23254976 | 129. 2831535 | 126. 6309916 | 142. 5188449 |
|          | 55. 82513045 | 57. 56849501 | 55. 23115612 | 80. 35117356 | 68. 54860227 | 80. 72129388 | 62. 64286898 |
|          | 46. 92678854 | 56. 85365434 | 60. 25027623 | 65. 34026513 | 68. 57880811 |              |              |
| CORIN    | 8100154      | 28. 66645963 | 20. 50286646 | 28. 23443801 | 42. 27036216 | 25. 43664871 | 37. 86671583 |
|          | 24. 54010744 | 33. 88262454 | 18. 28568013 | 31. 23778276 | 26. 91537364 | 30. 24565323 | 16. 65566383 |
|          | 18. 87148823 | 14. 43890125 | 18. 76216306 | 16. 38598362 | 14. 48156313 |              |              |
| CYBRD1   | 8046333      | 98. 20836943 | 121. 6679147 | 105. 7754055 | 108. 3833032 | 112. 8221427 | 125. 3452376 |
|          | 61. 43139532 | 51. 08349883 | 63. 02558879 | 72. 14678789 | 49. 35860228 | 54. 29339933 | 37. 71224683 |
|          | 43. 05484401 | 37. 04747092 | 40. 76874137 | 36. 43431521 | 34. 50421805 |              |              |
| DSC3     | 8022692      | 42. 78392978 | 46. 81366885 | 43. 78686294 | 32. 63411431 | 55. 29268821 | 53. 13030104 |
|          | 25. 54862114 | 23. 50791978 | 24. 7693099  | 21. 74548003 | 29. 08601018 | 26. 15937356 | 19. 27460074 |

FilteredRawArrayData

|                 |              |              |              |              |              |              |
|-----------------|--------------|--------------|--------------|--------------|--------------|--------------|
| 27. 84298005    | 15. 09321454 | 16. 23640956 | 19. 15810004 | 17. 48354739 |              |              |
| FGF2 8097256    | 50. 43626245 | 54. 19896788 | 46. 61956797 | 50. 36901279 | 61. 21214144 | 54. 22001175 |
| 35. 96826807    | 46. 29690251 | 37. 44164126 | 33. 98776977 | 42. 14446575 | 37. 46272893 | 29. 01407415 |
| 34. 33327683    | 28. 16887032 | 28. 77298996 | 27. 66106976 | 27. 66106976 |              |              |
| G6PD 8176133    | 775. 5570987 | 870. 0078359 | 879. 2673103 | 765. 7205551 | 841. 3778643 | 844. 2851109 |
| 724. 6439438    | 817. 2778311 | 809. 6563622 | 701. 9751763 | 790. 368501  | 778. 4757365 | 609. 4330929 |
| 648. 3552661    | 682. 0556555 | 599. 3121414 | 575. 2541115 | 621. 6911887 |              |              |
| GAL3ST1 8075401 | 140. 2499447 | 121. 4979901 | 126. 6028182 | 134. 741145  | 111. 6915853 | 114. 501707  |
| 84. 58682037    | 109. 5211669 | 81. 55536961 | 85. 6340372  | 96. 83688541 | 77. 02306216 | 87. 42593228 |
| 79. 50903048    | 87. 85314213 | 100. 7836237 | 74. 06385451 | 91. 48983064 |              |              |
| H2AFY2 7928107  | 477. 3788081 | 391. 2618304 | 466. 2084368 | 424. 5341582 | 378. 3881643 | 451. 4278489 |
| 407. 5194215    | 364. 357059  | 321. 0561349 | 383. 0830699 | 310. 1632187 | 318. 6851402 | 292. 3033652 |
| 201. 3768659    | 281. 7823146 | 269. 9617346 | 250. 2305579 | 267. 1454748 |              |              |
| HMOX1 8072678   | 367. 1022314 | 268. 5693306 | 269. 4782067 | 448. 1859839 | 327. 7213458 | 293. 2932048 |
| 308. 758921     | 216. 8004414 | 208. 1748843 | 347. 386519  | 228. 2591027 | 223. 5028728 | 204. 6934559 |
| 149. 4044025    | 144. 01465   | 218. 1117747 | 162. 4340457 | 129. 6831102 |              |              |
| HPX 7946167     | 351. 855447  | 208. 8058152 | 493. 7306129 | 301. 4479347 | 162. 3807878 | 447. 7775838 |
| 282. 8642267    | 190. 9843059 | 270. 4753651 | 269. 7041909 | 160. 7529141 | 247. 3241514 | 141. 5438023 |
| 109. 9753172    | 128. 484787  | 137. 3503678 | 97. 59379182 | 131. 3146825 |              |              |
| HSPB1 8133721   | 454. 7122461 | 445. 204769  | 523. 2091362 | 459. 1584341 | 401. 4673615 | 452. 8115836 |
| 386. 1018506    | 410. 5939494 | 421. 3007074 | 320. 7147767 | 386. 2941329 | 341. 2401992 | 319. 9166552 |
| 332. 1657352    | 375. 8586261 | 330. 2396746 | 346. 8923497 | 338. 400177  |              |              |
| IL1R1 8043995   | 222. 4606923 | 259. 1072811 | 238. 9291103 | 193. 1926655 | 263. 3157893 | 256. 3761641 |
| 193. 362664     | 178. 0994659 | 177. 555671  | 180. 1520694 | 192. 1379132 | 193. 1506311 | 140. 1780082 |
| 149. 0863047    | 131. 4355746 | 148. 6729086 | 163. 1922094 | 147. 1409534 |              |              |
| ITGB7 7963614   | 34. 62036652 | 37. 3550408  | 39. 74608043 | 41. 13563079 | 43. 33779296 | 46. 29132235 |
| 36. 16254212    | 37. 82633949 | 39. 57548447 | 31. 02409622 | 34. 65151228 | 35. 6141759  | 27. 71792099 |
| 30. 80751303    | 30. 96420104 | 31. 04231271 | 28. 88954345 | 33. 81612182 |              |              |
| ITI H4 8088020  | 70. 44986737 | 67. 29615354 | 73. 51671137 | 64. 94955725 | 54. 71206334 | 67. 04745692 |
| 43. 06382318    | 47. 93323361 | 50. 53733494 | 47. 70299798 | 51. 41514977 | 55. 8661413  | 44. 8702111  |
| 45. 12716774    | 47. 83559347 | 45. 72003927 | 48. 70231774 | 52. 42062487 |              |              |
| KCNJ10 7921533  | 21. 85187865 | 25. 25360759 | 27. 63501294 | 65. 23810312 | 76. 26213762 | 63. 10183994 |
| 27. 10390202    | 31. 51579864 | 31. 47455847 | 50. 0478928  | 44. 17876743 | 44. 26531103 | 20. 65268054 |
| 27. 4152395     | 30. 42402825 | 25. 04237788 | 30. 80486803 | 25. 95690535 |              |              |
| KLF12 7972003   | 23. 05286579 | 31. 86284791 | 26. 33608716 | 20. 50932385 | 31. 5084889  | 34. 0852058  |
| 24. 31722742    | 24. 70750647 | 22. 03912395 | 22. 14445983 | 25. 72398497 | 22. 11547623 | 13. 38989773 |
| 21. 89592595    | 17. 84777902 | 14. 26273309 | 15. 94297491 | 14. 07097017 |              |              |
| MAGEA3 8175747  | 180. 7681336 | 130. 5606372 | 81. 25457018 | 187. 0722575 | 108. 7245657 | 84. 47047529 |
| 126. 9512918    | 67. 14524383 | 63. 36995798 | 89. 53542484 | 82. 08986708 | 62. 64140309 | 35. 00585422 |
| 53. 25563133    | 44. 7316604  | 42. 71365146 | 37. 26606147 | 31. 96110458 |              |              |
| MASP1 8092661   | 45. 60181166 | 47. 50404446 | 44. 36346759 | 82. 82370169 | 73. 777906   | 57. 65559585 |
| 35. 19487782    | 45. 24326742 | 32. 88802961 | 68. 54549391 | 63. 09921567 | 58. 25601494 | 42. 54315888 |
| 44. 03953392    | 44. 15871035 | 43. 68663407 | 48. 93323978 | 44. 91358139 |              |              |
| MCC 8113551     | 62. 50357844 | 58. 05987781 | 61. 01214144 | 54. 54757847 | 46. 98354128 | 62. 43706814 |



FilteredRawArrayData

|                |              |              |              |              |              |              |
|----------------|--------------|--------------|--------------|--------------|--------------|--------------|
| 37. 16661614   | 34. 85190113 | 43. 70794948 | 32. 65874632 | 46. 44399844 | 42. 67783718 | 33. 97969621 |
| 30. 55844445   | 44. 76775383 | 34. 33409151 | 51. 29751111 | 38. 83215578 |              |              |
| MEP1A 8120088  | 87. 96655676 | 46. 46025809 | 42. 46091647 | 73. 11726845 | 62. 50189582 | 44. 22690154 |
| 42. 65922216   | 35. 56960233 | 32. 94644993 | 39. 59234782 | 38. 17941412 | 29. 56885752 | 31. 97793785 |
| 36. 01574311   | 29. 13112472 | 32. 78493843 | 28. 98365881 | 30. 95994265 |              |              |
| MKRN3 7981911  | 85. 02141921 | 92. 06448405 | 90. 43984512 | 86. 97079843 | 86. 10156954 | 96. 73700669 |
| 79. 13797914   | 87. 04975484 | 72. 96284846 | 78. 22145387 | 87. 9449779  | 75. 76086844 | 59. 79566114 |
| 49. 30565231   | 61. 79682421 | 61. 25975528 | 58. 17132047 | 58. 66123424 |              |              |
| MNS1 7989146   | 47. 17686398 | 33. 24953005 | 27. 96488199 | 37. 5160078  | 33. 03646065 | 26. 07047979 |
| 32. 37751907   | 26. 33257479 | 20. 14124445 | 32. 83805161 | 20. 84388568 | 18. 68713424 | 20. 65389306 |
| 14. 03963027   | 18. 01359295 | 18. 76845115 | 14. 94517308 | 15. 36856707 |              |              |
| MOGAT1 8048725 | 32. 80294915 | 31. 26778338 | 26. 88104311 | 23. 6075897  | 21. 96938107 | 23. 25284162 |
| 20. 80526389   | 21. 70880642 | 24. 28107498 | 19. 03047875 | 24. 12052046 | 24. 20246529 | 19. 10339219 |
| 19. 56356237   | 23. 46574613 | 24. 93074124 | 23. 76956581 | 23. 81468948 |              |              |
| MSRB3 7956856  | 26. 81618625 | 28. 43122908 | 29. 27708031 | 27. 99279914 | 30. 36232438 | 27. 78783712 |
| 19. 42170413   | 20. 97618028 | 24. 07271016 | 21. 36456306 | 21. 18699956 | 21. 35476638 | 20. 75407053 |
| 30. 41205128   | 22. 78794129 | 18. 9263691  | 16. 72829304 | 19. 36456101 |              |              |
| MTMR8 8173245  | 13. 54218608 | 15. 16808285 | 15. 07201503 | 15. 2451511  | 12. 92151597 | 11. 43721313 |
| 13. 80878009   | 10. 93063875 | 9. 278524201 | 10. 33319335 | 11. 25257368 | 11. 49053796 | 9. 732747415 |
| 9. 65051959    | 7. 485096144 | 10. 7201738  | 8. 708160309 | 8. 139482994 |              |              |
| MYL9 8062312   | 182. 2547862 | 188. 4440744 | 158. 4434639 | 195. 1519103 | 232. 7894383 | 149. 6147308 |
| 134. 5419366   | 165. 3728026 | 145. 8079463 | 121. 0875023 | 201. 4498321 | 144. 285366  | 89. 88914666 |
| 101. 7074743   | 82. 58281439 | 92. 9481096  | 95. 56908987 | 83. 53664074 |              |              |
| NOTCH2NL       | 7904702      | 122. 3250002 | 105. 2228859 | 127. 6885973 | 108. 7865023 | 110. 4658778 |
| 121. 326729    | 108. 1587522 | 108. 0180622 | 126. 257619  | 108. 7348569 | 118. 5350419 | 111. 381151  |
| 76. 77583283   | 89. 99878003 | 94. 41149276 | 91. 55907431 | 96. 20979061 |              | 93. 42567814 |
| NPNT 8096704   | 267. 4765831 | 389. 9621594 | 380. 2228853 | 195. 4540232 | 328. 0724833 | 379. 1406298 |
| 149. 9630558   | 227. 3522435 | 191. 1472948 | 133. 5794492 | 188. 2033283 | 164. 6868055 | 140. 857432  |
| 179. 1968551   | 142. 1153254 | 140. 3796376 | 106. 2092091 | 147. 6077032 |              |              |
| PAK1 7950578   | 136. 6167052 | 130. 5043267 | 115. 3692412 | 96. 35517531 | 111. 9501748 | 107. 6111843 |
| 85. 68365218   | 96. 91122962 | 78. 46519537 | 69. 09453241 | 77. 30483613 | 63. 06131932 | 59. 74364842 |
| 59. 83060403   | 57. 57914549 | 47. 98192483 | 55. 10419745 | 55. 18003074 |              |              |
| PLAGL1 8129985 | 58. 44030139 | 77. 99246503 | 59. 43306797 | 66. 09146908 | 107. 1161447 | 60. 74889239 |
| 44. 64679784   | 42. 31671263 | 39. 88114325 | 41. 48693732 | 42. 48635761 | 41. 22781734 | 36. 4381509  |
| 36. 63790299   | 33. 67768846 | 34. 37810789 | 36. 33391173 | 34. 78148792 |              |              |
| PLCE1 7929388  | 17. 22300256 | 18. 5961781  | 26. 17848503 | 14. 34684255 | 19. 22737652 | 18. 59413914 |
| 10. 65884827   | 11. 17640092 | 11. 9132508  | 9. 59270915  | 10. 46211193 | 11. 98613254 | 9. 037881999 |
| 12. 09339104   | 10. 68502342 | 10. 63415256 | 11. 83440281 | 10. 80088013 |              |              |
| PLP1 8169061   | 26. 00316866 | 32. 18498501 | 26. 84550574 | 30. 06975264 | 27. 57593417 | 24. 30221128 |
| 19. 12609166   | 23. 60856978 | 20. 70408314 | 20. 2632513  | 19. 95745301 | 21. 79545097 | 18. 03044846 |
| 19. 04797422   | 18. 70664084 | 15. 30357809 | 18. 35462836 | 15. 89137321 |              |              |
| PPL 7999253    | 59. 81344675 | 69. 19006085 | 47. 52094579 | 94. 65577615 | 150. 329554  | 91. 03181241 |
| 41. 55256336   | 55. 02138069 | 51. 65371028 | 95. 94630856 | 111. 0746797 | 84. 18227781 | 42. 56415651 |
| 57. 54703591   | 62. 53816825 | 58. 73974967 | 66. 94410413 | 59. 27499213 |              |              |

FilteredRawArrayData

|                 |              |              |              |              |              |              |
|-----------------|--------------|--------------|--------------|--------------|--------------|--------------|
| PRKCE 8041763   | 89. 6283397  | 88. 21395414 | 101. 8688287 | 150. 8306945 | 120. 9596847 | 128. 2605604 |
| 89. 45442024    | 91. 19704958 | 96. 49004478 | 93. 0017774  | 109. 0879691 | 115. 7192399 | 75. 76584297 |
| 94. 08050895    | 80. 98731414 | 69. 17926801 | 91. 05677785 | 89. 78162438 |              |              |
| PRRG4 7939150   | 27. 40579006 | 28. 82227251 | 29. 14517297 | 35. 25972618 | 50. 83182319 | 29. 47303311 |
| 22. 88385959    | 21. 14125154 | 19. 8148101  | 25. 24217617 | 23. 92742656 | 19. 30295924 | 21. 40029153 |
| 22. 27059236    | 19. 10539133 | 21. 36790308 | 18. 04301719 | 25. 31989192 |              |              |
| PTPRJ 7939839   | 104. 1244017 | 120. 9316324 | 146. 2511479 | 132. 521663  | 153. 5236683 | 178. 4398559 |
| 96. 03114223    | 119. 5368341 | 136. 7850074 | 105. 0121414 | 137. 2537243 | 141. 1209631 | 64. 54547478 |
| 70. 85009233    | 82. 78036987 | 73. 58519745 | 88. 11031447 | 73. 03135182 |              |              |
| RCN1 7939120    | 554. 3295653 | 582. 2887437 | 425. 4493669 | 481. 7240366 | 546. 2014434 | 451. 9590701 |
| 442. 7981947    | 435. 1898038 | 391. 6449714 | 424. 9331176 | 380. 3262523 | 354. 2371045 | 372. 1457762 |
| 286. 0695061    | 249. 0022437 | 343. 0284122 | 269. 8713255 | 296. 9332802 |              |              |
| RNF157 8018652  | 51. 78586937 | 50. 08465183 | 52. 51963677 | 64. 11435266 | 61. 04589704 | 48. 16281464 |
| 42. 27587083    | 43. 30806601 | 36. 2118426  | 36. 11470751 | 44. 20061539 | 38. 84745789 | 33. 68194502 |
| 36. 5954062     | 35. 163932   | 30. 47385977 | 39. 66558462 | 34. 60473766 |              |              |
| SALL2 7977761   | 77. 23874992 | 76. 76058005 | 75. 93984001 | 111. 3478736 | 149. 1728945 | 141. 874622  |
| 65. 16660121    | 71. 85062841 | 74. 41192144 | 80. 05943661 | 113. 8504203 | 112. 6475729 | 61. 7597725  |
| 64. 91660151    | 69. 8410566  | 63. 90160413 | 52. 91214146 | 83. 18728204 |              |              |
| SERPI ND1       | 8071420      | 2180. 393701 | 2336. 948196 | 2304. 971712 | 2426. 444701 | 2639. 724664 |
| 2792. 594561    | 2106. 302729 | 2035. 069219 | 2100. 370018 | 2430. 628497 | 2369. 573522 | 2348. 546361 |
| 1867. 407058    | 1754. 931277 | 1706. 061727 | 1986. 85213  | 2110. 354748 | 2168. 823527 |              |
| SERPI NF2       | 8003656      | 766. 8981416 | 840. 4055667 | 903. 1670964 | 829. 0913455 | 926. 7969763 |
| 910. 2952592    | 771. 0744764 | 804. 9303904 | 743. 1618099 | 839. 4086593 | 958. 6858332 | 786. 0050355 |
| 647. 1100848    | 588. 6104812 | 552. 6538281 | 656. 1876519 | 645. 5184469 | 552. 8614253 |              |
| SERPI NG1       | 7940028      | 137. 535009  | 106. 3981702 | 105. 1733337 | 139. 6384931 | 98. 33896704 |
| 113. 9851785    | 72. 14164731 | 51. 81397044 | 52. 47853389 | 72. 61289564 | 62. 35467821 | 53. 79020957 |
| 57. 28513945    | 58. 7645092  | 44. 63296449 | 52. 32533514 | 56. 5964619  | 41. 86730103 |              |
| SIRPA 8060418   | 115. 5348433 | 157. 3043714 | 247. 4721782 | 146. 6352485 | 134. 6214582 | 181. 9439622 |
| 98. 30619249    | 117. 5474602 | 137. 5304532 | 101. 8800117 | 114. 7407855 | 125. 1751584 | 78. 52103898 |
| 102. 0584553    | 85. 74818595 | 59. 69960351 | 105. 0446742 | 71. 69201865 |              |              |
| SLC22A7 8119782 | 210. 734201  | 157. 1569271 | 208. 6276279 | 168. 6704277 | 132. 0696349 | 193. 4495728 |
| 101. 0362617    | 85. 10226212 | 104. 1585902 | 84. 4713404  | 77. 61290147 | 78. 2128623  | 97. 11871689 |
| 75. 07282368    | 90. 74962501 | 99. 58353077 | 58. 70979852 | 84. 5699104  |              |              |
| SLC6A12 7960177 | 79. 86606071 | 95. 54725487 | 118. 0298078 | 116. 8491193 | 151. 9711485 | 137. 5714344 |
| 48. 03091466    | 64. 68323011 | 50. 28025403 | 67. 07909587 | 81. 7605071  | 80. 49751986 | 46. 08707766 |
| 45. 06542092    | 61. 09508414 | 62. 84836401 | 55. 34691042 | 51. 99316497 |              |              |
| SLC02B1 7942569 | 101. 7316039 | 120. 5080128 | 178. 3384434 | 143. 4180272 | 209. 932881  | 286. 4690532 |
| 75. 82579878    | 100. 4834935 | 85. 87536379 | 104. 8414016 | 138. 0372613 | 127. 8651531 | 67. 76177816 |
| 83. 00005139    | 80. 52844005 | 75. 77579486 | 90. 83991168 | 90. 43017195 |              |              |
| SPARC 8115327   | 306. 2262957 | 261. 7493627 | 398. 6362471 | 244. 8319274 | 255. 2868231 | 365. 9640634 |
| 276. 1103134    | 210. 5891876 | 251. 8797828 | 260. 8317461 | 193. 8449531 | 240. 3936245 | 185. 2512015 |
| 103. 565788     | 124. 4394599 | 164. 0012431 | 96. 43292949 | 122. 5502488 |              |              |
| TEAD2 8038347   | 99. 94925619 | 111. 7680982 | 121. 0018999 | 91. 48098357 | 104. 9778236 | 106. 3991424 |
| 78. 02197419    | 102. 8302287 | 90. 44545111 | 80. 17797434 | 85. 10206895 | 74. 67949681 | 75. 54406977 |

|                 |              |              |              |              |              |              |
|-----------------|--------------|--------------|--------------|--------------|--------------|--------------|
| 68. 48191503    | 81. 29137275 | 63. 64949503 | 65. 7426212  | 66. 86152346 |              |              |
| TGM4 8079279    | 50. 76981096 | 42. 54721339 | 53. 49466673 | 42. 78318368 | 45. 67153066 | 44. 96708933 |
| 30. 05931029    | 41. 04265014 | 35. 74343745 | 28. 82143417 | 28. 9642428  | 32. 80049879 | 32. 00615567 |
| 30. 64533744    | 36. 75337454 | 30. 56448281 | 33. 94448462 | 34. 40999251 |              |              |
| THRA 8007008    | 167. 4958495 | 187. 769864  | 187. 7767289 | 248. 4617855 | 298. 2454748 | 208. 7678094 |
| 120. 2499121    | 135. 386677  | 148. 9998295 | 128. 8078002 | 115. 4358915 | 143. 8522912 | 123. 6423973 |
| 131. 2211504    | 146. 1575313 | 135. 0815901 | 109. 3954248 | 144. 9726405 |              |              |
| TIMP3 8072626   | 571. 0454748 | 841. 2935671 | 619. 5454748 | 847. 6808856 | 1253. 353395 | 879. 2437634 |
| 482. 214771     | 584. 7116538 | 492. 8173744 | 596. 6751781 | 743. 4121414 | 668. 212403  | 469. 9179242 |
| 553. 9146273    | 502. 4010293 | 531. 773985  | 636. 102976  | 646. 1525715 |              |              |
| TMEFF1 8156905  | 240. 304825  | 193. 0515165 | 192. 3266249 | 291. 898837  | 306. 6792205 | 329. 4292713 |
| 122. 0968143    | 140. 4710295 | 136. 1306706 | 174. 9550801 | 133. 8995752 | 181. 7182644 | 103. 1156283 |
| 120. 4950462    | 108. 2482029 | 160. 4645388 | 143. 2180185 | 136. 6581234 |              |              |
| TNS1 8058869    | 46. 54948767 | 62. 18128759 | 50. 86727858 | 69. 92956049 | 108. 2582882 | 79. 81817517 |
| 46. 31806707    | 52. 81647636 | 41. 3741726  | 48. 00701664 | 71. 99917729 | 57. 37682122 | 39. 89117121 |
| 54. 46936579    | 38. 18934661 | 44. 69130153 | 41. 80902207 | 46. 76745836 |              |              |
| TRIM2 8097841   | 56. 82065925 | 59. 24914076 | 60. 72620773 | 42. 17801297 | 67. 37230552 | 70. 05663819 |
| 44. 26959995    | 56. 07891009 | 53. 17663119 | 42. 93581808 | 48. 67068542 | 57. 34519071 | 30. 01298088 |
| 35. 98003709    | 31. 32657438 | 31. 93019749 | 33. 32931361 | 38. 14212448 |              |              |
| TRIM73 8133625  | 428. 2493354 | 306. 4691244 | 293. 866368  | 257. 4121414 | 344. 8523971 | 309. 0780918 |
| 320. 7788081    | 379. 3288081 | 230. 4204846 | 192. 3128304 | 301. 9121414 | 211. 7689237 | 198. 8220006 |
| 107. 9099339    | 96. 67880811 | 174. 2503745 | 150. 1788081 | 105. 1961408 |              |              |
| TRIM74 8139966  | 85. 29462825 | 106. 5650081 | 106. 3991919 | 90. 76526188 | 98. 61302856 | 98. 78855991 |
| 91. 29409227    | 93. 87339022 | 97. 01844493 | 84. 74350908 | 98. 97439666 | 83. 17997104 | 76. 47913205 |
| 71. 9818813     | 71. 08368235 | 73. 37631292 | 74. 53216374 | 61. 32852737 |              |              |
| TSPAN7 8166784  | 724. 6521231 | 563. 309804  | 690. 2666203 | 835. 1129187 | 708. 9560691 | 744. 4289769 |
| 581. 9347891    | 521. 3897028 | 502. 8454981 | 709. 7909942 | 535. 0504388 | 504. 3900099 | 413. 7392517 |
| 443. 2593337    | 337. 4700823 | 455. 7456806 | 357. 9477956 | 296. 8551119 |              |              |
| TTC7B 7980720   | 67. 64435754 | 85. 16170642 | 87. 76500888 | 72. 71214144 | 100. 9572994 | 93. 31742651 |
| 40. 07433025    | 72. 04108117 | 64. 55151007 | 49. 91870223 | 62. 01363252 | 67. 9317524  | 41. 61184658 |
| 63. 73659652    | 58. 79310454 | 47. 44307525 | 47. 78645132 | 51. 26670045 |              |              |
| WNT11 7950534   | 112. 6710434 | 71. 02797128 | 75. 07437539 | 118. 307991  | 84. 43102906 | 118. 2609739 |
| 66. 38832007    | 55. 33691877 | 56. 37542988 | 91. 49907122 | 66. 34856281 | 70. 57877585 | 62. 76558877 |
| 50. 10933007    | 52. 64072088 | 60. 7868559  | 45. 39668938 | 46. 62034126 |              |              |
| WT1 7947363     | 78. 90173816 | 83. 92976274 | 70. 25315981 | 68. 34932891 | 75. 6452339  | 71. 28756784 |
| 64. 67478018    | 79. 34503741 | 63. 08795014 | 45. 59548058 | 47. 43809644 | 57. 00551671 | 41. 14101998 |
| 56. 2069973     | 47. 58494509 | 41. 00092325 | 47. 15709164 | 39. 43395938 |              |              |
| ZAK 8046461     | 55. 82892569 | 51. 60046125 | 71. 67496793 | 55. 21794889 | 54. 81368738 | 63. 95917305 |
| 56. 87595387    | 40. 71684281 | 51. 69490018 | 58. 02704108 | 48. 56664262 | 54. 8525492  | 34. 97784909 |
| 37. 12831532    | 37. 36663753 | 34. 20611124 | 38. 93808287 | 41. 72110571 |              |              |
| ARHGEF9 8173217 | 66. 11152296 | 65. 66023864 | 69. 90598514 | 61. 07834452 | 67. 49720004 | 64. 03557343 |
| 49. 68717301    | 61. 6306557  | 50. 87589453 | 54. 07214095 | 54. 79881882 | 47. 45673416 | 36. 4195012  |
| 29. 95394794    | 30. 08654192 | 33. 163931   | 46. 87379974 | 35. 58115935 |              |              |
| AYTL1 7995697   | 124. 121267  | 135. 2267484 | 135. 4373    | 123. 6184822 | 146. 7613854 | 148. 0462493 |

FilteredRawArrayData

|                 |              |              |              |              |              |              |
|-----------------|--------------|--------------|--------------|--------------|--------------|--------------|
| 181. 9584798    | 166. 8800331 | 181. 4170561 | 166. 0947808 | 158. 1817468 | 155. 1501584 | 103. 782101  |
| 92. 92388103    | 90. 98423877 | 93. 77435269 | 85. 90826453 | 91. 00670987 |              |              |
| CES1 8001457    | 2355. 447332 | 2203. 33093  | 2879. 112141 | 2597. 833899 | 2386. 614943 | 3009. 187558 |
| 1872. 678808    | 1561. 980816 | 2066. 345475 | 2023. 174538 | 1842. 869212 | 2103. 030153 | 1370. 465546 |
| 1118. 506747    | 1340. 036557 | 1391. 824008 | 1090. 685848 | 1179. 022998 |              |              |
| CHN1 8056890    | 182. 9426542 | 159. 6844542 | 153. 0553045 | 209. 6431793 | 221. 2471732 | 219. 3648778 |
| 100. 0747509    | 91. 77731659 | 88. 35859859 | 107. 426198  | 95. 16472171 | 95. 7504833  | 35. 56867894 |
| 35. 5344504     | 58. 66318823 | 41. 47427451 | 41. 1023078  | 53. 2947443  |              |              |
| CNNM1 7929732   | 96. 40175991 | 96. 86191317 | 111. 4097765 | 89. 33515651 | 103. 2475295 | 110. 607977  |
| 74. 26843959    | 73. 47851187 | 85. 82075086 | 71. 25836964 | 76. 51561784 | 81. 09969507 | 51. 77052825 |
| 48. 68729931    | 50. 75352587 | 46. 26604856 | 59. 94141023 | 51. 31870096 |              |              |
| ENG 8164269     | 77. 07437361 | 103. 1607303 | 82. 0209863  | 256. 9899179 | 255. 7108533 | 165. 434238  |
| 64. 61917003    | 86. 75551931 | 66. 98596293 | 114. 5860646 | 138. 8113343 | 123. 0320877 | 64. 88980649 |
| 73. 03088003    | 72. 15925022 | 63. 89592203 | 67. 54418827 | 69. 80681404 |              |              |
| ENPP2 8152522   | 262. 7861998 | 234. 2862081 | 281. 9917166 | 407. 9206439 | 397. 2756132 | 453. 5909397 |
| 138. 1116948    | 128. 6159357 | 163. 0391461 | 196. 0209227 | 190. 2697994 | 199. 08401   | 67. 43961803 |
| 68. 96319761    | 81. 73277226 | 71. 67682566 | 73. 79413303 | 109. 6913733 |              |              |
| FLJ21986        | 8135734      | 126. 7832174 | 110. 4507288 | 109. 6167081 | 113. 0611337 | 116. 2861834 |
| 114. 1510757    | 109. 3256892 | 100. 463614  | 107. 5367649 | 103. 6068449 | 101. 8758181 | 105. 0229256 |
| 56. 55195581    | 48. 63824679 | 51. 67880815 | 57. 57966477 | 57. 08698368 | 49. 51516686 |              |
| FYN 8128956     | 184. 5454748 | 225. 7746585 | 196. 6886487 | 699. 6957059 | 783. 1321269 | 614. 4561113 |
| 105. 9807651    | 129. 6381306 | 108. 9001409 | 320. 6347615 | 348. 2715049 | 248. 0531047 | 111. 0344928 |
| 109. 4378439    | 113. 2794339 | 175. 1784636 | 169. 3859642 | 173. 9097609 |              |              |
| HEPACAM 7952475 | 161. 2761787 | 192. 7851058 | 221. 0758152 | 128. 9788081 | 178. 9369154 | 186. 3126226 |
| 172. 1174626    | 205. 3835282 | 228. 9582759 | 149. 8949155 | 175. 0788081 | 204. 6311915 | 104. 7648808 |
| 91. 23882706    | 96. 22695103 | 92. 02060819 | 101. 2253623 | 91. 40847456 |              |              |
| HI ST1H2AH      | 8117543      | 42. 56379574 | 28. 38235522 | 36. 74941182 | 34. 06190692 | 27. 66903055 |
| 22. 91323068    | 23. 09700604 | 20. 01682128 | 24. 12948727 | 21. 579026   | 16. 19431359 | 25. 89364948 |
| 8. 368745732    | 12. 86594009 | 9. 467453545 | 8. 548818283 | 10. 5976149  | 10. 31999964 |              |
| HI ST1H2BK      | 8124492      | 261. 979044  | 134. 9145016 | 63. 78204525 | 195. 5491824 | 212. 6401021 |
| 209. 5036381    | 97. 72214177 | 59. 00414866 | 177. 2054888 | 119. 552439  | 66. 24547478 | 96. 2045195  |
| 27. 38086656    | 13. 45703941 | 21. 14645103 | 11. 42467798 | 18. 29608521 |              | 21. 61041178 |
| HTR1D 7913566   | 111. 3976457 | 163. 4248391 | 130. 3389386 | 152. 9798245 | 187. 5124401 | 172. 559468  |
| 114. 1885457    | 165. 8138768 | 138. 6816229 | 116. 8919455 | 195. 361364  | 144. 9815755 | 75. 35041353 |
| 71. 28968088    | 66. 84086701 | 71. 15299729 | 69. 8514898  | 76. 85741733 |              |              |
| INS 7945688     | 208. 3371588 | 255. 7586501 | 236. 4013837 | 203. 0594597 | 229. 0238537 | 232. 599289  |
| 193. 9702682    | 235. 8665164 | 212. 7700281 | 208. 4355775 | 243. 5308723 | 221. 9345523 | 157. 6322905 |
| 169. 2627964    | 176. 0338204 | 160. 4429695 | 152. 3828403 | 158. 5278813 |              |              |
| KLHL13 8174654  | 46. 40353322 | 44. 16407056 | 47. 73756528 | 40. 12880649 | 39. 68007451 | 44. 48562233 |
| 55. 13408551    | 45. 88541419 | 60. 41628576 | 34. 1041354  | 41. 15309501 | 47. 12003989 | 22. 66211687 |
| 25. 63647159    | 22. 10236418 | 24. 30867604 | 17. 33867992 | 18. 73325132 |              |              |
| MUC15 7947156   | 49. 54321751 | 44. 82850705 | 51. 36325721 | 49. 67785178 | 55. 98746896 | 52. 09251775 |
| 65. 6388354     | 41. 6133372  | 45. 22271374 | 61. 83311884 | 45. 92937053 | 44. 6124965  | 27. 21781243 |
| 24. 27572413    | 27. 00969116 | 28. 99538394 | 27. 32747877 | 21. 92179012 |              |              |

FilteredRawArrayData

|              |              |              |              |              |              |              |              |
|--------------|--------------|--------------|--------------|--------------|--------------|--------------|--------------|
| MX1          | 8068713      | 43. 3086576  | 57. 20812531 | 44. 69035244 | 49. 94083534 | 56. 41182121 | 49. 98689752 |
| 52. 35302808 | 46. 12952062 | 50. 84874216 | 46. 88570546 | 51. 52211918 | 48. 16183229 | 36. 10186615 |              |
| 30. 76595611 | 34. 55142022 | 32. 60296644 | 38. 49841984 | 34. 29248951 |              |              |              |
| MX2          | 8068697      | 204. 6431386 | 202. 4980086 | 222. 5532505 | 228. 8372487 | 240. 5970958 | 270. 8586977 |
| 201. 8949807 | 215. 2439684 | 228. 4522502 | 252. 1352529 | 244. 4250066 | 284. 359595  | 125. 3970454 |              |
| 134. 197683  | 138. 687574  | 144. 3865305 | 164. 4299485 | 168. 003022  |              |              |              |
| NAT8L        | 8093578      | 128. 7548886 | 177. 1216201 | 166. 0355669 | 157. 1621216 | 212. 0120377 | 186. 1552611 |
| 137. 4213672 | 157. 6959341 | 141. 2499689 | 145. 256907  | 156. 3959871 | 184. 4914132 | 86. 57623347 |              |
| 95. 43567161 | 83. 99512162 | 102. 3786208 | 86. 28683315 | 75. 62136863 |              |              |              |
| OLFML1       | 7938225      | 50. 29236702 | 34. 42488457 | 40. 09646626 | 36. 84041202 | 30. 05520198 | 37. 51947075 |
| 38. 09884229 | 26. 20614787 | 28. 09949863 | 24. 108002   | 22. 07650099 | 22. 83931346 | 14. 62471748 |              |
| 12. 08511255 | 10. 63499293 | 16. 36239225 | 9. 670199859 | 14. 3476524  |              |              |              |
| PRKCH        | 7974835      | 53. 0329083  | 62. 8067284  | 62. 3361699  | 61. 6548915  | 66. 7717948  | 63. 98417837 |
| 52. 89966027 | 57. 76216434 | 47. 6248124  | 48. 96007903 | 55. 16320263 | 47. 94324451 | 23. 5155829  |              |
| 23. 41027009 | 27. 5601766  | 25. 08418737 | 32. 29742072 | 31. 16147736 |              |              |              |
| PTAFR        | 7914184      | 38. 30479369 | 55. 0163618  | 54. 37083133 | 119. 5385155 | 135. 4062101 | 117. 9517452 |
| 34. 16055274 | 49. 59631265 | 42. 03020294 | 70. 3156608  | 91. 97353293 | 86. 0146467  | 44. 6907781  |              |
| 42. 42608909 | 53. 22267907 | 42. 07847617 | 49. 18048507 | 47. 31236156 |              |              |              |
| RNASE2       | 7973110      | 37. 54710566 | 34. 35165631 | 33. 62083328 | 36. 24469703 | 32. 01418536 | 43. 62544457 |
| 33. 80959152 | 32. 13668375 | 33. 17728725 | 42. 12755351 | 34. 4896954  | 39. 12497622 | 26. 65898445 |              |
| 28. 13727543 | 21. 44648319 | 21. 69135458 | 24. 61474957 | 27. 54328151 |              |              |              |
| SERPINB9     | 8123609      | 107. 5807949 | 147. 1679511 | 136. 8784025 | 208. 8818619 | 321. 9593481 | 289. 61929   |
| 95. 57172155 | 111. 6269059 | 93. 76360657 | 202. 6880937 | 244. 193416  | 183. 7404125 | 75. 36838145 |              |
| 92. 58343733 | 75. 26969667 | 93. 61426586 | 110. 9283041 | 116. 9480465 |              |              |              |
| SLAIN1       | 7969533      | 62. 74768268 | 65. 76874426 | 61. 85053259 | 65. 18374549 | 71. 62336572 | 53. 25716778 |
| 55. 92431135 | 53. 40383558 | 35. 50996226 | 47. 3475503  | 42. 54715937 | 35. 54904462 | 27. 84451782 |              |
| 18. 49354593 | 25. 16084062 | 24. 86154428 | 23. 11242733 | 20. 82053802 |              |              |              |
| SLC37A2      | 7944931      | 58. 63447872 | 60. 22128845 | 59. 64758987 | 83. 04054729 | 133. 658706  | 90. 42611233 |
| 28. 73108619 | 54. 4703189  | 47. 83536882 | 55. 542825   | 94. 54026429 | 60. 95759488 | 29. 46950637 |              |
| 37. 58573291 | 30. 89109192 | 30. 58012383 | 32. 63505611 | 35. 21529945 |              |              |              |
| SULT1C2      | 8044212      | 141. 5572412 | 96. 98459851 | 98. 68881166 | 128. 7968292 | 101. 7801244 | 102. 7240621 |
| 107. 1326825 | 71. 51959317 | 71. 41765583 | 85. 84523663 | 85. 84523663 | 76. 22950798 | 57. 48071354 | 45. 25742737 |
| 39. 0293186  | 24. 40437911 | 46. 21616133 | 37. 96338817 | 37. 96338817 | 32. 58838557 |              |              |
| TRI B2       | 8040365      | 81. 11536665 | 104. 6725187 | 126. 6621992 | 99. 36049588 | 144. 0626252 | 129. 5461306 |
| 70. 40715708 | 82. 6084615  | 115. 7331763 | 79. 8758652  | 79. 8758652  | 113. 3743414 | 105. 558453  | 52. 93361902 |
| 40. 79813297 | 46. 5526851  | 37. 84043579 | 42. 96599241 | 42. 96599241 | 47. 33751742 |              |              |
| UGT2B4       | 8100784      | 1281. 420974 | 1123. 14592  | 1264. 879828 | 1369. 632071 | 1509. 455951 | 1576. 701775 |
| 911. 7865092 | 722. 0147856 | 898. 3673418 | 898. 3673418 | 1168. 839582 | 895. 6515855 | 1140. 490517 | 388. 0793074 |
| 367. 0173    | 269. 8676529 | 441. 3340908 | 441. 3340908 | 359. 7745935 | 299. 7542259 |              |              |
| VCAN         | 8106743      | 186. 3297903 | 208. 3896418 | 217. 7186363 | 135. 2137877 | 230. 2837623 | 201. 974611  |
| 111. 794701  | 173. 3337829 | 117. 2069408 | 117. 2069408 | 83. 40666536 | 133. 047265  | 94. 68597907 | 38. 87715219 |
| 35. 8467422  | 35. 91093391 | 26. 83726854 | 26. 83726854 | 38. 66786869 | 40. 50898418 |              |              |
| BBS5         | 8046147      | 84. 51195325 | 97. 48345547 | 81. 77100344 | 69. 46747137 | 88. 19776713 | 84. 60214575 |
| 113. 7186997 | 139. 6495905 | 126. 346929  | 126. 346929  | 97. 61930617 | 106. 0864913 | 113. 7037106 | 72. 42487163 |

|                |              |              |              |              |              |              |
|----------------|--------------|--------------|--------------|--------------|--------------|--------------|
| 86. 37022684   | 76. 72263402 | 71. 63831658 | 92. 40417654 | 84. 40117714 |              |              |
| ENPP4 8120061  | 41. 02752332 | 35. 04005376 | 31. 21064901 | 28. 01379733 | 38. 7268561  | 27. 69572425 |
| 41. 14498013   | 32. 66058502 | 33. 40058137 | 40. 91267448 | 32. 17446116 | 34. 36017039 | 25. 17694546 |
| 24. 60260465   | 21. 45067661 | 23. 01283341 | 22. 56477134 | 21. 4078248  |              |              |
| HERC5 8096361  | 12. 70358717 | 15. 20934793 | 13. 24042055 | 12. 26309345 | 11. 00705394 | 12. 48498511 |
| 18. 74429138   | 17. 7488842  | 19. 71333749 | 12. 91359289 | 12. 38702841 | 14. 14784409 | 10. 81820468 |
| 10. 97614934   | 11. 58807108 | 9. 797322022 | 14. 33655874 | 11. 71281974 |              |              |
| NEGR1 7916986  | 22. 85297085 | 23. 24044134 | 20. 86757961 | 21. 62493897 | 22. 66348817 | 23. 38537123 |
| 26. 83715012   | 25. 13290557 | 27. 009834   | 27. 18959129 | 23. 08067794 | 26. 10811242 | 17. 97038644 |
| 21. 37130345   | 20. 89704947 | 15. 15137411 | 18. 72369306 | 17. 22067543 |              |              |
| NRCAM 8142270  | 58. 33598425 | 50. 41957484 | 49. 68231762 | 58. 56997485 | 80. 41152695 | 57. 00039013 |
| 69. 39211027   | 66. 08504531 | 74. 56851588 | 82. 90946401 | 75. 212289   | 90. 75985697 | 40. 31996803 |
| 36. 32594863   | 38. 56122077 | 45. 665937   | 45. 72179282 | 50. 12770731 |              |              |
| PCK1 8063590   | 40. 1300469  | 43. 66351216 | 38. 48092772 | 79. 48606775 | 104. 7958744 | 67. 76656444 |
| 39. 01692331   | 50. 18913756 | 38. 29208913 | 165. 6306872 | 177. 2609466 | 75. 17879578 | 32. 56631271 |
| 52. 67774242   | 40. 1103903  | 42. 54290165 | 55. 00457202 | 34. 79495144 |              |              |
| SGK 8129677    | 62. 38712977 | 45. 12459067 | 37. 81014713 | 101. 0581891 | 84. 0255408  | 72. 88239807 |
| 103. 4900339   | 77. 71654215 | 83. 33052952 | 200. 3836143 | 160. 2051455 | 170. 595852  | 65. 66897795 |
| 48. 49034718   | 61. 14374823 | 92. 25446337 | 77. 93063295 | 88. 94665339 |              |              |
| ZNF185 8170602 | 36. 15812713 | 32. 3552266  | 34. 7851376  | 29. 75816896 | 34. 30836375 | 30. 19818657 |
| 48. 80320491   | 54. 87566883 | 46. 80516369 | 47. 51420852 | 60. 11003184 | 38. 48838064 | 28. 94794978 |
| 28. 62232131   | 26. 23314135 | 29. 31510007 | 28. 3846301  | 28. 5332598  |              |              |
