# Supplementary material
Source: PubMed Central journal article supplement (PMC2775939)

# Supplemental Figure S1

A

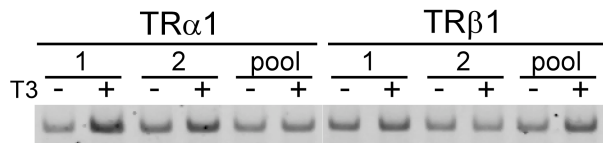

B

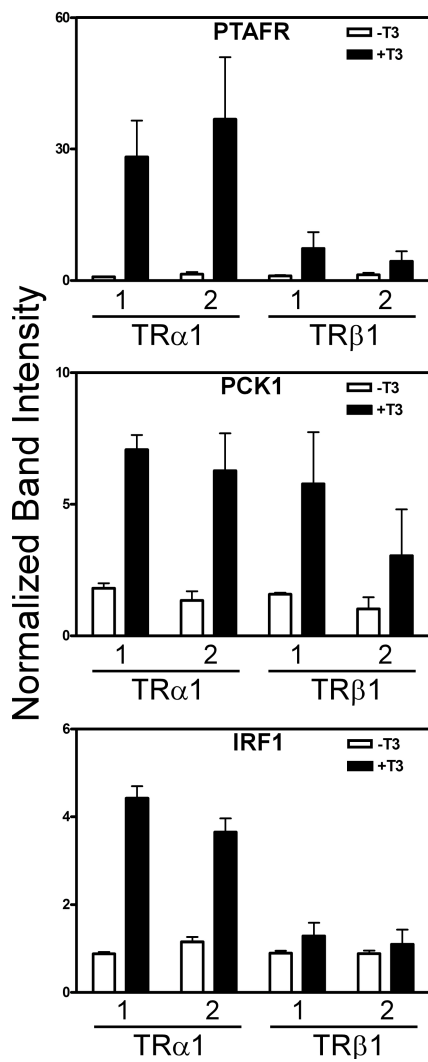

C

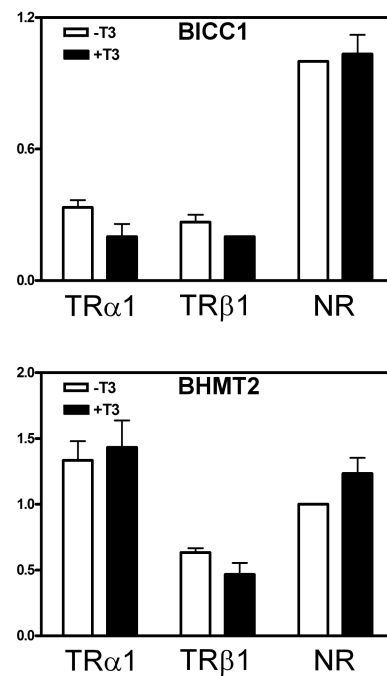

D

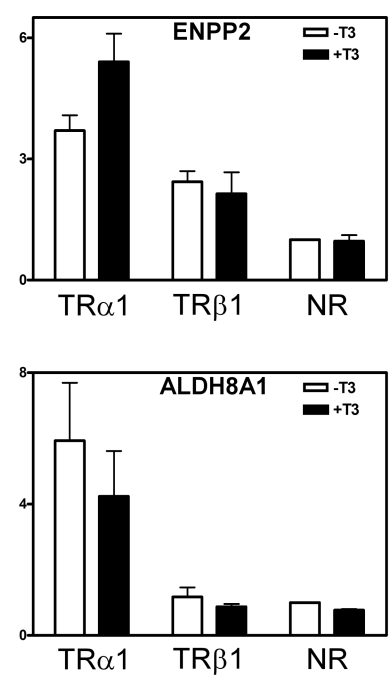

Supplement: me.2009-0025_2.pdf [file me.2009-0025_2.pdf]
